# Supplementary material for: Amorphous oxide as a novel efficient catalyst for direct selective oxidation of methanol to dimethoxymethane
Source: Royal Society of Chemistry journal article supplement (doi:10.1039/b714260a), 2007-12-20
Supplement: b714260a.pdf [file b714260a.pdf]

## Amorphous oxide as a novel efficient catalyst for direct selective oxidation of methanol to dimethoxymethane

Sébastien Royer, Xavier Sécordel, Markus Brandhorst, Franck Dumeignil,\* Sylvain Cristol, Mickaël Capron, Christophe Dujardin, Edmond Payen and Jean-Luc Dubois<sup>‡</sup>

### Supporting information

#### Synthesis of $\gamma\text{-Al}_2\text{O}_3$ sol gel support

In this procedure, aluminum tri-*sec*-butoxide (50 mL) was dissolved in 2-butanol (80 mL) under stirring at 358 K. Then, aluminum alkoxide complexation was performed by addition of 35 mL of butan-1,3-diol before subsequent hydrolysis using 35 mL of water. After addition of water, the stirring was kept during 1 h at 358 K before keeping the solution under static conditions at room temperature during 1 h more. The powder obtained after evaporation in a rotary evaporator was dried overnight at 373 K before subsequent calcination at 773 K under air for 4 h (temperature increase rate = 0.6 K.min<sup>-1</sup>).

#### Preparation of AR01

AR01, which is a bulk catalyst of general formula  $\text{Mo}_{12}\text{V}_3\text{W}_{1.2}\text{Cu}_{1.2}\text{Sb}_{0.5}\text{O}_x$ , is prepared as follows: 1.63 g of ammonium paratungstate are added to 60 mL of distilled water previously heated at 368 K. Once the tungsten precursor is dissolved, 11.0 g of ammonium heptamolybdate and 1.82 g of ammonium metavanadate, and then antimony acetate, are then successively added under stirring to the solution. 'Solution I' is thus obtained. 'Solution II' is then obtained by adding 1.56 g of copper sulfate to 10 mL of distilled water. When copper precursor is dissolved, Solution II is slowly added to Solution I under stirring. The obtained slurry is then dried at 373 K, calcined at 663 K for 5 h under air flow (temperature increase rate = 1 K.min<sup>-1</sup>), and cooled to room temperature in the same atmosphere. AR01 composition was checked by ICP. The difference between the measured composition and the theoretical one did not exceed 5 %.

#### Preparation of Re/Al<sub>2</sub>O<sub>3</sub> and Re/TiO<sub>2</sub>

Anatase-TiO<sub>2</sub> (Sachtleben-HOMKAT K03) and  $\gamma\text{-Al}_2\text{O}_3$  (prepared by sol-gel procedure described in a section of the present ESI) supported Re samples (7.4 wt.% Re on TiO<sub>2</sub> and 20 wt.% Re on  $\gamma\text{-Al}_2\text{O}_3$ ) are prepared by grinding the support with metallic Re at room temperature before calcination at 673 K in O<sub>2</sub> for 6 h. Prior to use, the samples were activated at 623 K for 1 h under pure O<sub>2</sub> flow.

#### Catalytic test procedure

Catalytic activities for the methanol oxidation reaction were evaluated in a fixed-bed reactor. Before test, AR01 was activated 1 h at 613 K (temperature increase rate = 10 K.min<sup>-1</sup>). Reaction feed was composed of  $x$  Vol.% CH<sub>3</sub>OH (where  $x = 5, 7.5, 19, 28, 38$ ) and 8.5 Vol.% O<sub>2</sub> in helium. GHSV was adjusted at 22000 mL.h<sup>-1</sup>.g<sup>-1</sup>. Reactants and products were analyzed using an on-line gas microchromatograph (SRA3000) equipped with two columns (Q plot, Molecular sieves) and two TCDs. Carbon balance was comprised between 95 % and 105 %, which was considered as satisfactory.

**Table S1** Effect of the activation atmosphere on the catalytic performances of AR01. Test conditions: 7.5 Vol.% CH<sub>3</sub>OH; 8.5 Vol.% O<sub>2</sub> in He; total flow rate of 54.4 mL.min<sup>-1</sup> (GHSV = 22000 mL.h<sup>-1</sup>.g<sup>-1</sup>); temperature of 553 K.

| Activation conditions              |                           |              | Conversion/<br>% | Selectivity/ mol.% |      |      |       |                 |     |
|------------------------------------|---------------------------|--------------|------------------|--------------------|------|------|-------|-----------------|-----|
| Flow rate/<br>mL.min <sup>-1</sup> | O <sub>2</sub> /<br>Vol.% | He/<br>Vol.% |                  | DMM                | F    | DME  | CO    | CO <sub>2</sub> | MF  |
| 20                                 | 100                       | 0            | 68.3             | 90.1               | 4.3  | 3.9  | Trace | 0               | 1.7 |
| 20                                 | 20                        | 80           | 63.0             | 89.2               | 4.0  | 3.2  | 1.8   | 0               | 1.7 |
| 20                                 | 0                         | 100          | 56.8             | 82.7               | 8.5  | 4.8  | 1.8   | Trace           | 2.2 |
|                                    | None                      |              | 34.9             | 2.0                | 77.6 | 10.1 | 5.3   | 0               | 5.1 |

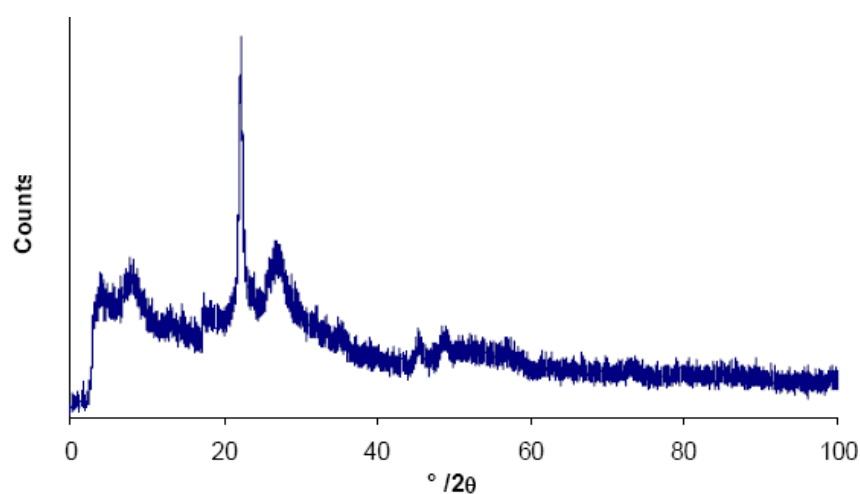

**Fig. S1** XRD diffractogram of AR01. AR01 is essentially amorphous and the peak near  $2\theta = 22^\circ$  is attributed to octahedral MoO<sub>6</sub> entities stacking.

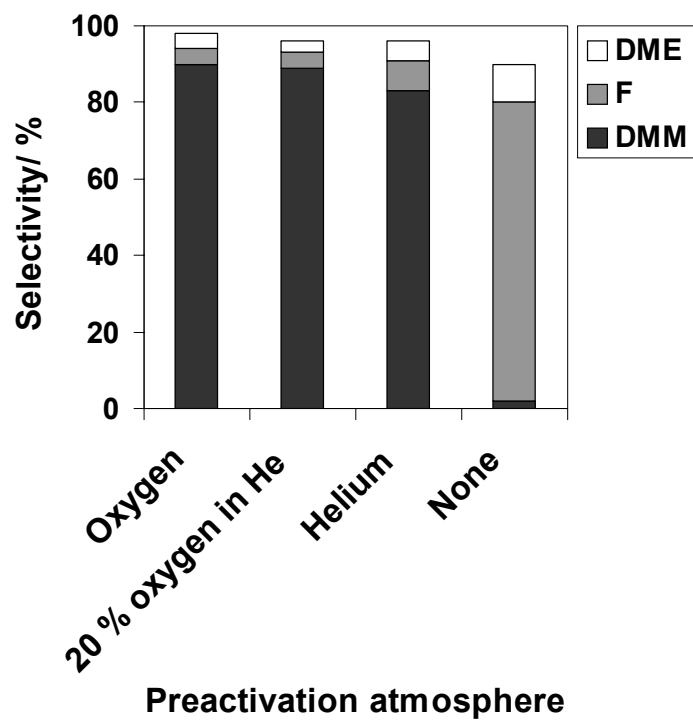

**Fig. S2** Effect of the activation atmosphere on the selectivity of AR01. Test conditions: 7.5 Vol.% CH<sub>3</sub>OH; 8.5 Vol.% O<sub>2</sub> in He; total flow rate of 54.4 mL.min<sup>-1</sup> (GHSV = 22000 mL.h<sup>-1</sup>.g<sup>-1</sup>); temperature of 553 K.

**Table S2** Effect of the methanol partial pressure in the feed on the catalytic performances of AR01 at 553 K.

| CH <sub>3</sub> OH | Feed composition/ Vol.% |      | Conversion/ % |  | Selectivity/ mol.% |      |     |     |                 | $P_{DMM}^a$ | $P_{DMM+F+DME}^a$                                                    |                                                                      |
|--------------------|-------------------------|------|---------------|--|--------------------|------|-----|-----|-----------------|-------------|----------------------------------------------------------------------|----------------------------------------------------------------------|
|                    | O <sub>2</sub>          | He   | %             |  | DMM                | F    | DME | CO  | CO <sub>2</sub> | MF          | $10^{-5} \cdot \text{mol} \cdot \text{min}^{-1} \cdot \text{g}^{-1}$ | $10^{-5} \cdot \text{mol} \cdot \text{min}^{-1} \cdot \text{g}^{-1}$ |
| 5.0                | 8.5                     | 86.5 | 78.2          |  | 88.4               | 6.0  | 3.8 | 0   | 0               | 1.8         | 51                                                                   | 57                                                                   |
| 7.5                | 8.5                     | 84.0 | 63.0          |  | 89.2               | 4.0  | 3.2 | 1.8 | 0               | 1.7         | 63                                                                   | 68                                                                   |
| 19.0               | 8.5                     | 72.5 | 39.7          |  | 86.4               | 4.0  | 6.0 | 1.8 | 0               | 1.8         | 97                                                                   | 108                                                                  |
| 28.0               | 8.5                     | 63.5 | 40.5          |  | 74.7               | 13.6 | 8.1 | 1.4 | 0               | 2.2         | 126                                                                  | 163                                                                  |
| 38.0               | 8.5                     | 53.5 | 25.1          |  | 71.6               | 14.5 | 9.0 | 2.2 | 0               | 2.6         | 102                                                                  | 135                                                                  |

<sup>a</sup>  $P$  = Productivity defined as the number of moles of CH<sub>3</sub>OH converted in DMM (or DMM+DME+F) per minute and per gram of catalyst. For example,  $P_{DMM}$  is calculated using the following formula:

$$P_{DMM} = \frac{Q_{CH_3OH} (L \cdot \text{min}^{-1}) \cdot X(\%) \cdot S(\%) \cdot I}{24.4 (L \cdot \text{mol}^{-1}) \cdot 10000 \cdot m_{\text{cata}} (g)}$$
